# Supplementary material for: Higher Education Experiences of Students with Autism Spectrum Disorder: Challenges, Benefits and Support Needs
Source: Springer Nature journal article supplement (doi:10.1007/s10803-014-2324-2), 2014-12-02
Supplement: MOESM1 [file 559658]

[Top Appendix A]

**Appendix A** **Extract interview schedule**

**INTRODUCTION**

The purpose of this interview is to gain a better understanding of college experiences of students with ASD, both academically and socially. We are interested in your experiences, in the challenges you have faced or still face and in factors that contributed to success in the domains of education, student life, daily living and the transition to work. Before we discuss your experiences and your recommendations, we are interested to get to know you better. We first will talk about your interests and hobbies, what you do for studies/work.

*Open-ended questions*

What are your interests and hobbies? What are your talents? What major classes do you take? Do you have a favorite class? What job would you like to do in the future?

*Prompts*

E.g., What are you really good at? Do you spend a lot of time on these interests? What are your dislikes? Are you satisfied with your choice of university major?

**SECTION. EDUCATION**

*Introduction*

The transition from secondary to higher education brings along many changes. We will first focus on ‘education’, participating in classes, exams, studying, etc. We would like to hear how the transition to postsecondary education was, which things went well, what your concerns were, which challenges or difficulties arose, and how you overcame specific difficulties. We would also like to know if you looked for support, and what your experiences were in this regard. We are also interested in your recommendations.

*Open-ended questions*

What are your experiences of participating in classes, completing assignments, studying, exams, etc.? Which challenges do you encounter? How difficult is it to manage these challenges? Have you asked your institution for support or help? Which support is effective for you? Are there particular support measures that are more effective for you? In which way are staff members helpful to you? Are there particular types of academic support that you wish you had received? Tell me about your support recommendations.

*Prompts*

E.g., What are your academic strengths/weaknesses? What are the greatest challenges for you? Do you think your ASD has an important impact? Are any of the challenges that you face related to misunderstandings about ASD? What are the procedures in your institution to apply for support? Is it easy to ask for assistance? Have you told the academic staff about your ASD? If so, what are their reactions? Do they have an accurate perception of ASD? Are they helpful to you? How did you choose the institution you are currently attending? What factors were crucial for your decision?

**SECTION STUDENT LIFE**

*Introduction*

In higher education, a large amount of new student activities on and outside the campus are organized, e.g., activities run by student clubs, international exchanges, etc. We would like to know if you participate in these activities, which aspects are going well, which challenges or difficulties arise, and how you overcome these. We also like to know if you have looked for support, and what your experiences have been in this regard. We are also interested to hear your support recommendations.

*Open-ended questions*

Are you involved in any club or any other social activities? Do you meet any of your fellow students outside the campus? Are you experiencing specific difficulties? Have you asked for support or help? What/who are important people/services/ that support you in student life? Which are the things that your college might offer to support students with ASD that would benefit certain aspects of student life? Tell me about your recommendations.

*Prompts*

E.g., What activities do you enjoy outside of school? How often do you participate in these activities? Do you have many social contacts? How is your contact with others? Do you find it easy to make friends? How important are your relationships? What do you experience as really challenging in student life? What are the greatest challenges? How difficult is it to manage these challenges? Do you think your ASD has an important impact on student life? Have you told your fellow students about your ASD? What are their reactions? Do they have an accurate perception of ASD? Are there students who are particularly helpful? How are they helpful to you? What are your social strengths/weaknesses? Are there particular support services that are more supportive for you? Are there any particular support measures that you wish you had received?

**SECTION DAILY (INDEPENDENT) LIVING**

*Introduction*

For many students, the transition to higher education also involves a change to independent living. In this topic are interested to find out more about your experiences related to daily (independent) living. We would like to know if you live independently, which aspects are going well, the types of challenges or difficulties that arise, and how you overcome specific difficulties. We would like to hear whether if you have looked for support, and what your experiences are in this respect. We would also like to know your support recommendations.

*Open-ended questions*

What is your daily living situation? Are you living independently? Which tasks do you take care of? Which tasks or situations do you find rather challenging? Which/who are important people/services/ that support you in your daily (independent) living? Which are issues that are really important for students with ASD? What are the general recommendations for services that regulate housing? What are your recommendations?

*Prompts*

E.g., Which factors have had an important impact on your decision to live in residence? How did you choose your housing? Which are the greatest challenges that you are faced with? Do you think your ASD has an important impact on daily living? How difficult is it to manage these challenges? Have you told your roommates about your ASD? How did they react? Do they have an accurate perception on ASD? Are there roommates who are particularly helpful or supportive? In what way are they helpful to you? Are there any particular support measures that you wish you had received?

**SECTION TRANSITION TO EMPLOYMENT**

*Introduction*

The transition to employment is another big step. In this theme we would like to hear about your aspirations or experiences regarding this transition. We would like to know which challenges or difficulties (could) arise, and how you overcome specific difficulties. We are also interested if you have looked for support, and what your experiences are in this respect. We also wish to hear your support recommendations.

*Open-ended questions*

What are your career aspirations? How did you experience the transition from college/university to employment?

Have you asked for support? What are the issues for employers and colleagues? What are recommendations for the employers and colleagues?

*Prompts*

E.g., What type of employment would you like to have in the future? Do you plan to ask for support there? What are the greatest challenges? How difficult is it to manage these challenges? Do you think your ASD has an important impact on your work? Have you told your colleagues about your ASD? What are their reactions? Do they have an accurate perception of ASD? Are there colleagues who are particularly helpful or supportive? In which way are they helpful to you? Have there been situations in which they have not been helpful to you? Are their particular support measures that you wish you had received?

**CONLUSION**

Is there anything else that you would like to share with me about your college or university experience?
